# Supplementary material for: How to get better TAD? Relationship between anteversion angle of nail and position of femoral neck guide pin during nailing of intertrochanteric fractures
Source: BMC Musculoskelet Disord. 2020 Aug 1;21:512. doi: 10.1186/s12891-020-03518-5 (PMC7395984; doi:10.1186/s12891-020-03518-5)
Supplement: Supplementary file 2 — Additional file 2. Patients’ data. [file 12891_2020_3518_MOESM2_ESM.xlsx]

## Sheet: Sheet1
Case	Gender	Age	L/R	AO type	ASA	Cause	Hospital day (d)	Operative time (min)	Fuoroscopy (min)	Transfused blood (U)	α1	β1	β2	α2	TAD (mm)	Quality of Reduction	Complication	Post TUG (s)	6-week post TUG(s)	3-month post TUG (s)	Post Harris score	6-week post Harris score	3-month post Harris score
1	M	72	L	31A2.2	2	Traffic	5	62	2.4	1	130.51	40.15	125.31	20.16	21	Good(0)		92	42	20	34	48	61
2	M	83	L	31A2.2	3	Traffic	6	80	3.8	6	132.37	42.73	127.27	21.16	23	Good(0)		131	31	28	46	79	66
3	M	83	L	31A2.2	3	Traffic	6	73	2.3	No	120.13	18.73	120.94	21.23	18	Good(2;Valgus)		143	17	28	58	51	89
4	F	79	L	31A2.3	2	Falling	5	97	2.4	3	135.14	35.43	130.62	17.95	24	Good(0)	Urinary tract infection,delirium	172	28	19	72	72	66
5	F	75	L	31A2.3	3	Falling	5	45	2.7	3	130.34	23.78	128.26	16.47	19	Good(3;valgus)		133	15	20	35	68	83
6	M	77	L	31A2.3	3	Falling	4	47	3.2	No	133.73	36.42	132.36	19.07	25	Good(0)		144	14	18	39	82	57
7	F	72	R	31A2.1	2	Falling	7	52	3.4	9	137.85	33.94	135.16	21.84	20	Good(2;Valgus)		156	16	19	65	73	64
8	M	68	R	31A2.1	4	Falling	8	63	3.8	2	129.63	19.27	128.19	16.53	21	Good(1;Varus)		177	16	15	48	52	83
9	M	69	R	31A2.2	3	Falling	6	51	3.6	No	126.83	20.23	128.97	24.26	23	Good(0)		98	12	10	33	69	70
10	M	69	L	31A2.2	3	Falling	5	68	2.9	6	125.63	30.28	123.38	21.58	25	Good(0)	vulvar ulcerations	111	20	16	51	68	62
11	M	72	L	31A2.2	3	Falling	8	77	1.8	No	131.38	26.85	128.27	16.75	21	Good(0)		63	13	15	68	76	70
12	M	85	R	31A2.2	3	Falling	10	60	2.5	No	132.37	21.83	131.94	18.47	25	Good(0)		57	27	20	44	63	87
13	F	77	R	31A2.1	2	Falling	8	57	1.5	6	134.84	38.26	131.84	23.25	17	Good(2;varus)		172	25	20	47	79	76
14	F	74	R	31A2.2	3	Falling	6	54	3.1	4	140.73	36.74	135.74	15.83	19	Good(0)		133	35	37	44	64	72
15	F	80	L	31A3.1	3	Traffic	4	67	3.3	5	131.73	33.93	130.83	27.83	23	Good(0)		90	24	30	33	67	88
16	F	79	L	31A3.1	3	Traffic	5	61	2.1	No	135.83	31.84	132.93	17.27	25	Good(0)		82	92	31	61	68	73
17	F	84	R	31A3.1	2	Falling	7	70	1.6	No	136.83	30.83	133.05	15.25	22	Good(0)	delirium,hypoglycemia, uroschesis, bronchopneumonia	134	29	17	47	69	62
18	M	82	L	31A3.2	3	Falling	9	81	1.9	8	137.83	31.31	134.55	18.82	18	Good(2;Valgus)		82	77	32	36	72	74
19	M	81	L	31A2.3	3	Falling	9	66	2.2	4	132.68	33.25	131.21	20.12	19	Good(0)		110	75	33	62	65	87
20	M	80	L	31A2.3	3	Falling	7	55	2.2	4	136.03	29.32	132.73	21.35	22	Good(0)		129	31	54	43	66	59
21	M	70	L	31A2.3	3	Falling	6	54	2.1	1	137.63	29.73	133.83	27.28	18	Good(0)		180	76	43	33	75	63
22	M	65	L	31A2.3	3	Falling	5	62	1.5	2	121.62	16.86	125.27	23.26	17	Acceptable(7;Valgus)		90	88	11	66	60	63
23	M	68	L	31A2.3	2	Falling	5	50	2	2	126.73	15.27	129.83	21.26	21	Good(0)		97	95	100	65	46	84
24	F	72	R	31A2.3	1	Falling	12	52	1	2	125.27	17.73	128.26	23.47	23	Good(0)		115	43	27	41	71	67
25	F	73	R	31A2.3	2	Falling	8	66	0.9	No	133.26	31.23	131.16	27.47	22	Good(0)		140	133	138	72	47	74
26	M	66	R	31A2.3	2	Falling	7	64	1.3	2	131.73	27.17	128.17	20.83	18	Good(0)		177	37	23	36	60	77
27	F	69	R	31A2.2	3	Falling	4	68	0.8	4	137.62	33.38	134.83	19.73	20	Good(0)	vulvar ulcerations	143	55	21	34	81	72
28	M	70	R	31A2.2	2	Falling	4	70	1.9	3	125.38	16.82	127.12	23.62	15	Good(2;Valgus)		182	21	25	30	63	58
29	M	77	R	31A2.2	3	Falling	7	72	2.1	No	123.03	17.06	125.63	24.36	18	Good(4;Valgus)		77	45	20	74	54	76
30	M	78	L	31A2.2	2	Falling	7	65	2.3	No	127.17	17.62	128.19	24.19	21	Good(0)		134	52	48	53	45	66
31	M	80	L	31A2.2	2	Falling	6	66	2.3	No	129.73	21.13	127.27	14.84	22	Good(0)		100	55	34	42	65	86
32	M	85	R	31A2.2	3	Falling	6	77	1.4	4	124.84	24.12	123.33	20.32	22	Good(0)		112	77	43	67	72	83
33	F	85	L	31A2.2	2	Traffic	8	72	1.5	2	124.14	17.18	125.26	23.73	18	Good(2;Varus)		103	42	38	53	67	84
34	F	83	R	31A2.2	2	Traffic	7	82	1.4	No	126.47	19.37	127.23	24.64	18	Good(0)		113	95	36	53	48	69
35	M	84	R	31A2.2	2	Traffic	4	76	2.3	No	135.73	27.73	132.83	19.94	17	Good(3;Valgus)		157	55	29	70	48	78
36	M	71	L	31A2.2	2	Falling	6	75	1	2	137.93	31.73	135.16	23.36	19	Good(0)		169	67	32	40	64	66
37	M	80	R	31A2.2	3	Falling	4	64	1	2	128.95	22.42	128.11	24.15	23	Good(0)		172	44	19	74	49	68
38	F	75	R	31A2.2	2	Falling	5	58	1.1	No	130.73	17.63	132.92	24.37	21	Good(0)	Lower limb vein thrombosis	97	42	27	45	70	78
39	M	84	L	31A2.1	2	Falling	11	60	1.7	No	130.16	21.93	132.03	28.83	29	Acceptable(6;Varus)		96	47	29	60	76	71
40	F	80	L	31A2.1	3	Falling	17	68	2.5	5	141.26	32.82	138.26	24.62	21	Good(0)		98	56	44	73	65	76
41	F	70	L	31A2.3	2	Falling	10	62	0.8	2	130.87	28.64	130.14	24.23	18	Good(0)		101	22	42	66	80	77
42	M	65	R	31A2.2	2	Falling	8	76	0.9	2	133.93	31.93	131.26	21.43	23	Good(0)		159	27	23	69	53	67
43	F	71	L	31A2.3	2	Falling	6	54	1.5	No	136.93	35.92	132.75	24.56	17	Good(0)		148	43	22	66	58	68
44	F	69	R	31A2.3	3	Falling	8	85	1.7	2	139.15	21.52	136.46	14.42	16	Acceptable(7;Valgus)	Urinary tract infection	150	34	32	60	53	68
45	F	75	L	31A2.2	3	Falling	5	71	2.8	No	140.93	30.41	135.52	14.37	18	Good(0)		111	32	17	48	50	63
46	F	66	L	31A2.2	2	Falling	4	61	1.9	No	134.37	31.18	132.83	24.66	21	Good(0)		123	85	28	71	50	77
47	M	85	R	31A2.2	3	Falling	6	68	2	No	125.48	19.73	128.53	27.75	20	Good(0)		126	72	30	39	50	73
48	M	81	L	31A2.1	2	Falling	2	92	1.7	4	129.73	19.93	131.05	26.43	20	Good(3;Valgus)		89	64	32	36	62	75
49	M	83	L	31A2.1	3	Falling	7	57	1.6	4	131.26	23.53	129.83	16.24	19	Good(0)		109	55	43	55	68	85
50	M	81	R	31A2.3	2	Falling	8	58	1.6	4	127.17	17.62	128.19	24.19	21	Good(0)		103	78	39	50	51	83
